# Supplementary material for: Tuning the electrochemical performance of Ti3C2 and Hf3C2 monolayer by functional groups for metal-ion battery applications
Source: Royal Society of Chemistry journal article supplement (doi:10.1039/d0nr07899a), 2021-01-01
Supplement: d0nr07899a1.pdf [file d0nr07899a1.pdf]

## Supporting Information

### Tuning the electrochemical performance of $Ti_3C_2$ and $Hf_3C_2$ monolayer by functional groups for metal-ion batteries application

Zhifang Yang,<sup>a</sup> Yanping Zheng,<sup>b</sup> Wenliang Li,<sup>\*a</sup> Jingping Zhang<sup>\*a</sup>

*a. Faculty of Chemistry, National & Local United Engineering Laboratory for Power Batteries, Northeast Normal University, Changchun 130024, China;*

*b. Faculty of Chemistry, Tonghua Normal University, Tonghua, 134002, China.*

E-mail: [jpzhang@nenu.edu.cn](mailto:jpzhang@nenu.edu.cn); [liwl926@nenu.edu.cn](mailto:liwl926@nenu.edu.cn)

#### Table of contents

|                                                                                                        |     |
|--------------------------------------------------------------------------------------------------------|-----|
| Fig. S1 Snapshots of the final frame of I- $Ti_3C_2X_2$ and I- $Hf_3C_2X_2$ (X = Si, and P) monolayer. | P2  |
| Fig. S2 Variation in free energy of functionalized $Ti_3C_2$ monolayer.                                | P3  |
| Fig. S3 Variation in free energy of functionalized $Hf_3C_2$ monolayer.                                | P3  |
| Fig. S4 The PDOS for (a) I- $Ti_3C_2S_2$ and (b) I- $Ti_3C_2Cl_2$ .                                    | P4  |
| Fig. S5 The PDOS for (a) I- $Hf_3C_2S_2$ and (b) I- $Hf_3C_2Cl_2$ .                                    | P4  |
| Fig. S6 The charge density difference with M adsorbed on the surface of $Ti_3C_2Cl_2$ monolayer.       | P5  |
| Fig. S7 The charge density difference with M adsorbed on the surface of $Ti_3C_2S_2$ monolayer.        | P6  |
| Fig. S8 The charge density difference with M adsorbed on the surface of $Hf_3C_2Cl_2$ monolayer.       | P7  |
| Fig. S9 The charge density difference with M adsorbed on the surface of $Hf_3C_2S_2$ monolayer.        | P8  |
| Fig. S10 The top and side views of $Hf_3C_2S_2Ca_2$ monolayer.                                         | P8  |
| Fig. S11. The charge density map of $Ti_3C_2S_2$ monolayer (011) with Li atoms.                        | P9  |
| Fig. S12 The charge density map of $Ti_3C_2S_2$ monolayer (011) with Mg atoms                          | P9  |
| Fig. S13. Comparison of the metal diameters with the lattice constants of monolayer.                   | P10 |
| Table S1 The structure parameter of the optimized $Ti_3C_2X_2$ and $Hf_3C_2X_2$ monolayer.             | P11 |
| Table S2 The surface energy and $E_{\text{exf}}$ of $TM_3C_2X_2$ (TM = Ti, Hf, X = Si, P, S, and Cl).  | P11 |
| Table S3 The $E_b$ at different adsorption sites of metal atom on the $TM_3C_2X_2$ monolayer.          | P11 |
| Table S4 The most stable adsorption site of metal atom on the monolayer.                               | P12 |
| Table S5 Charge Transfer from metal to I- $TM_3C_2X_2$ monolayer by Bader charge analysis.             | P12 |
| Table S6 Diffusion barrier energies of M on the I- $TM_3C_2X_2$ monolayers surface.                    | P12 |
| Table S7 The calculated layer-by-layer adsorption energy of $Ti_3C_2S_2$ monolayer.                    | P12 |
| Table S8 The calculated layer-by-layer adsorption energy of $Ti_3C_2Cl_2$ monolayer.                   | P13 |
| Table S9 The calculated layer-by-layer adsorption energy of $Hf_3C_2S_2$ monolayer.                    | P13 |
| Table S10 The calculated layer-by-layer adsorption energy $Hf_3C_2Cl_2$ monolayer.                     | P13 |
| Table S11 Comparisons capacities and energy barriers with other materials as Li-ion batteries.         | P13 |
| Table S12 Comparisons capacities and energy barriers with other materials as Na-ion batteries.         | P14 |
| Table S13. Comparisons of energy barriers, storage capacities, and OCV of layered as Mg-ion batteries. | P14 |
| Table S14 The number of adsorption layers of metal atoms in different 2D materials.                    | P14 |
| Table S15 Coordinates corresponding to the most stable structure.                                      | P14 |

## Computational Details

The surface energy ( $\gamma$ )<sup>1</sup> of configuration I are considered, which is listed in Table S2.

The corresponding surface energy is defined as:

$$\gamma = \frac{E_{iso} - N_L \sigma_{bulk}}{2A}$$

The exfoliation energy ( $E_{exf}$ )<sup>2</sup> per unit area can be obtained exactly as the ground state energy difference between a bulk material and a single isolated layer, expressed as:

$$E_{exf} = \frac{E_{iso} - E_{bulk}}{A}$$

where  $E_{iso}$  and  $E_{bulk}$  denote the total energies of the primitive cell of an isolated slab and a bulk system, respectively.  $N_L$  is the total number of atoms in the slab,  $A$  is the area of the bottom or top face of the slab, and  $\sigma_{bulk}$  is the energy per atom in the bulk crystal.

## Supporting Figures

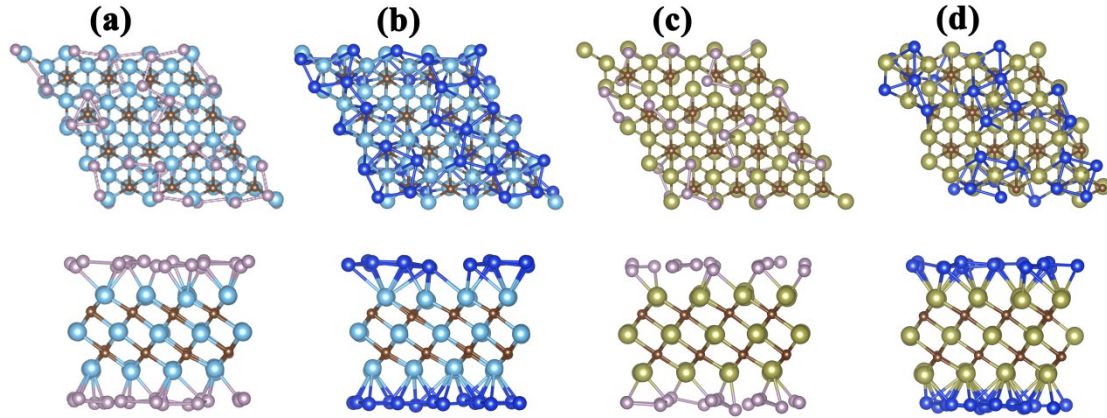

**Fig. S1** Snapshots of the final frame of I-Ti<sub>3</sub>C<sub>2</sub>X<sub>2</sub> and I-Hf<sub>3</sub>C<sub>2</sub>X<sub>2</sub> (X = Si, and P) monolayer at 300 K, (a) I-Ti<sub>3</sub>C<sub>2</sub>P<sub>2</sub>, (b) I-Ti<sub>3</sub>C<sub>2</sub>Si<sub>2</sub>, (c) I-Hf<sub>3</sub>C<sub>2</sub>P<sub>2</sub>, and (d)I-Hf<sub>3</sub>C<sub>2</sub>Si<sub>2</sub>..

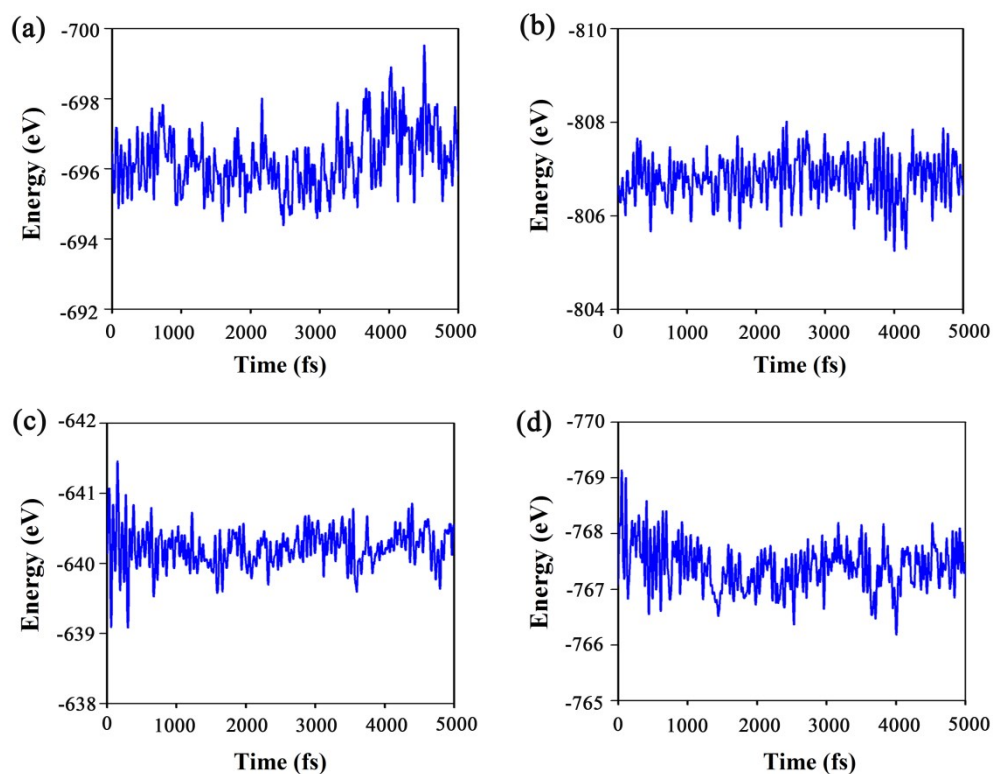

**Fig. S2.** Variation in free energy of (a) I-Ti<sub>3</sub>C<sub>2</sub>Si<sub>2</sub>, (b) I-Ti<sub>3</sub>C<sub>2</sub>P<sub>2</sub>, (c) I-Ti<sub>3</sub>C<sub>2</sub>S<sub>2</sub>, and (d) I-Ti<sub>3</sub>C<sub>2</sub>Cl<sub>2</sub> over 5 ps during the AIMD simulation at 300 K.

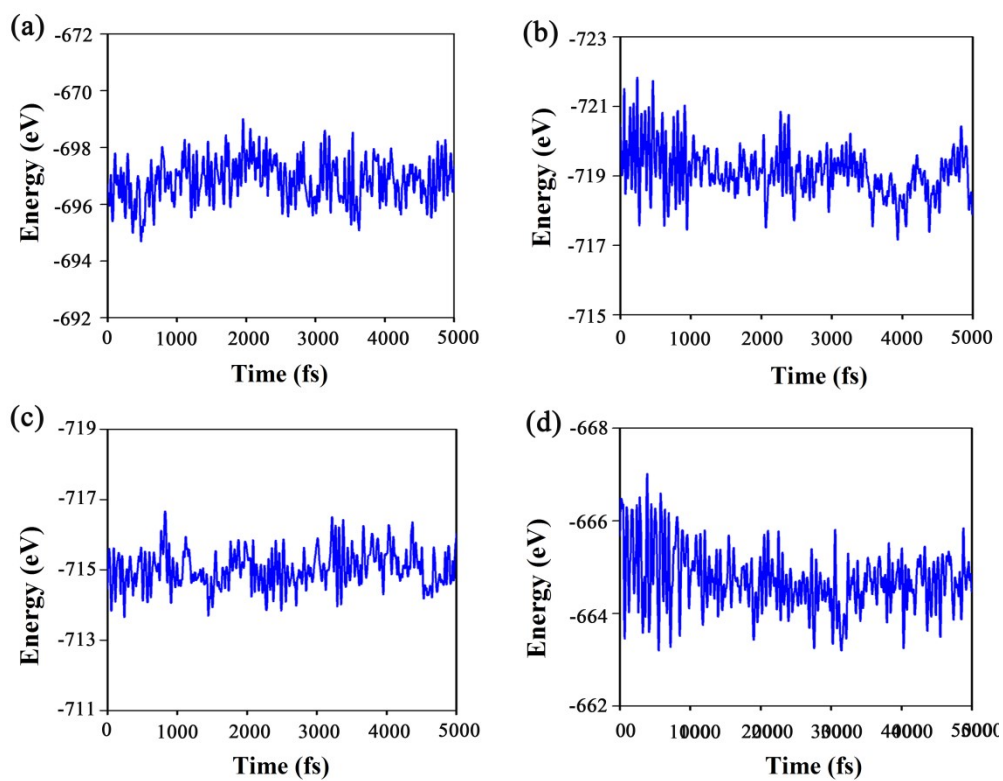

**Fig. S3.** Variation in free energy of (a) I-Hf<sub>3</sub>C<sub>2</sub>Si<sub>2</sub>, (b) I-Hf<sub>3</sub>C<sub>2</sub>P<sub>2</sub>, (c) I-Hf<sub>3</sub>C<sub>2</sub>S<sub>2</sub>, and (d) I-Hf<sub>3</sub>C<sub>2</sub>Cl<sub>2</sub> over 5 ps during the AIMD simulation at 300 K.

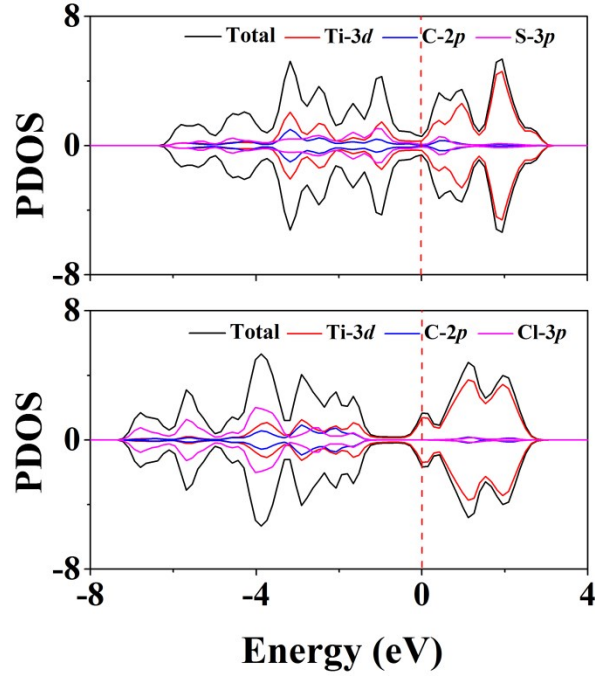

**Fig. S4.** The PDOS for (a) I-Ti<sub>3</sub>C<sub>2</sub>S<sub>2</sub> and (b) I-Ti<sub>3</sub>C<sub>2</sub>Cl<sub>2</sub>. The Fermi level is set to zero.

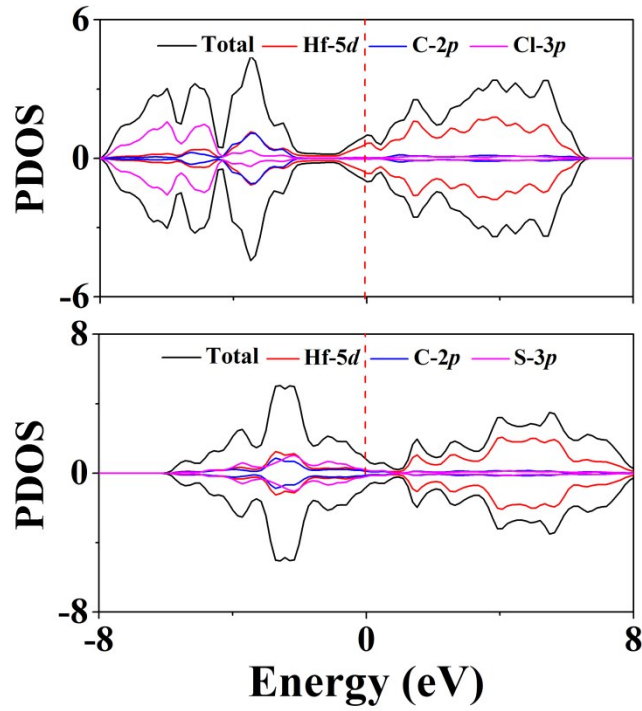

**Fig. S5.** The PDOS for (a) I-Hf<sub>3</sub>C<sub>2</sub>S<sub>2</sub> and (b) I-Hf<sub>3</sub>C<sub>2</sub>Cl<sub>2</sub>. The Fermi level is set to zero.

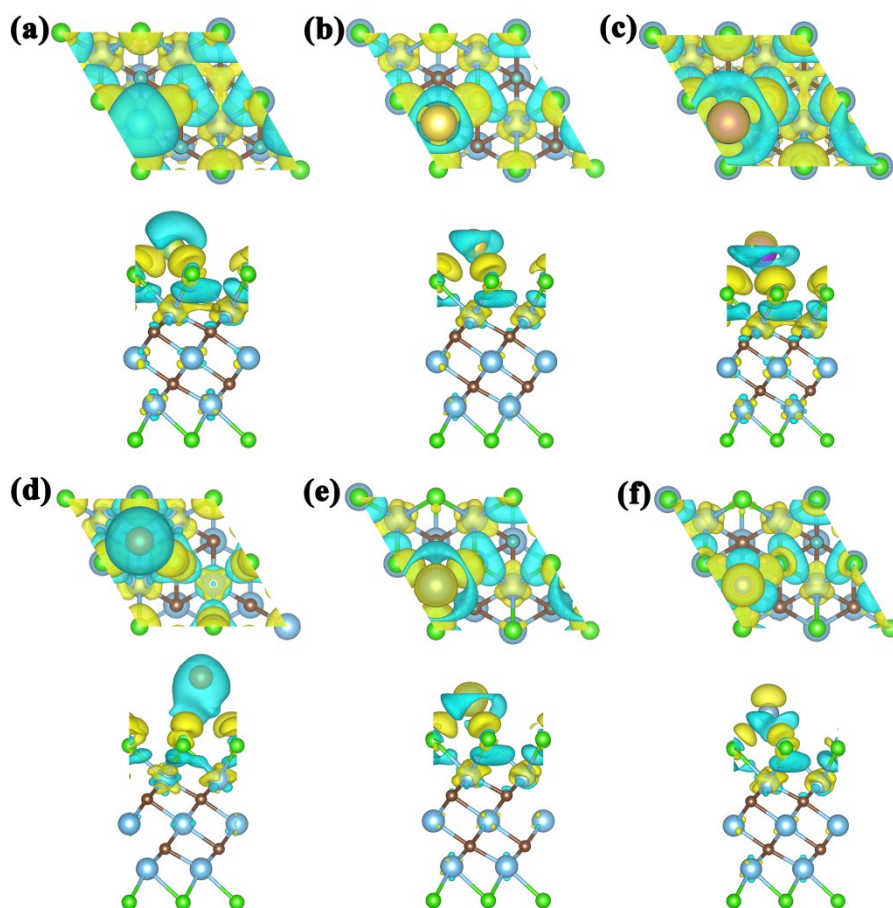

**Fig. S6.** Top and side view of charge density difference with Li, Na, K, Mg, Ca, Al adsorbed on the surface of  $\text{Ti}_3\text{C}_2\text{Cl}_2$  (a, b, c, d, e, f), respectively, with the isosurface value of  $0.0002 \text{ \AA}^{-3}$ . The yellow represents the charge sufficient, the blue represents the charge deficient.

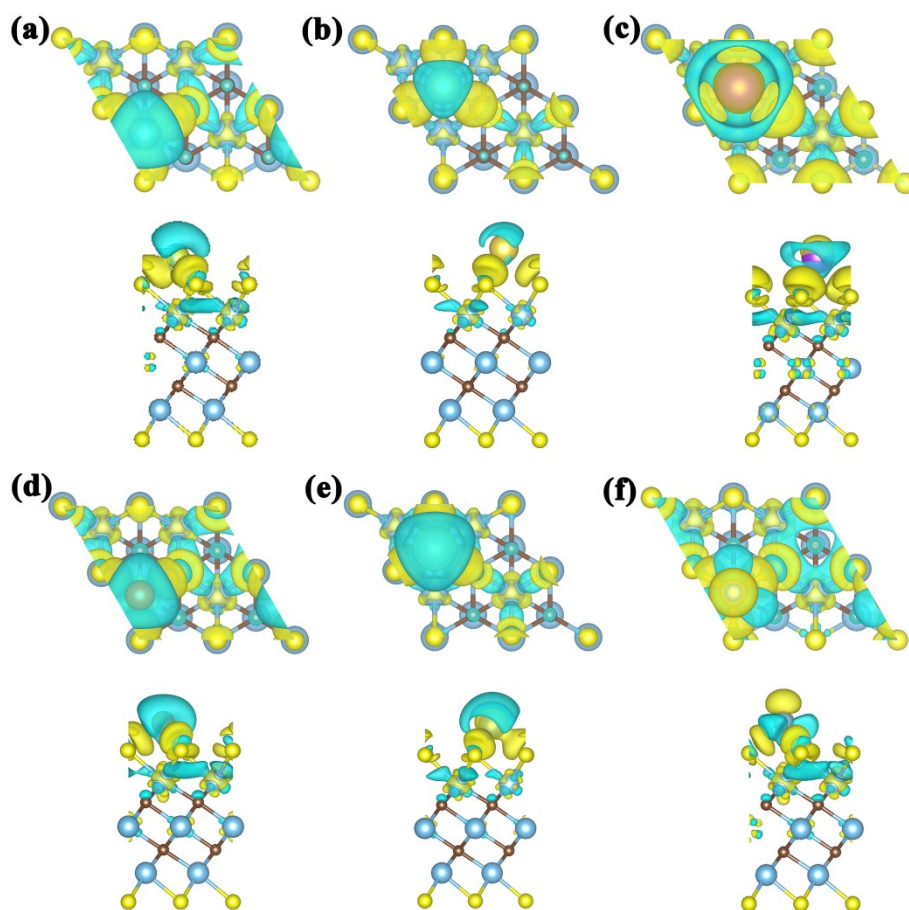

**Fig. S7.** Top and side view of charge density difference with Li, Na, K, Mg, Ca, Al adsorbed on the surface of  $\text{Ti}_3\text{C}_2\text{S}_2$  (a, b, c, d, e, f), respectively, with the isosurface value of  $0.0002 \text{ \AA}^{-3}$ . The yellow represents the charge sufficient, the blue represents the charge deficient.



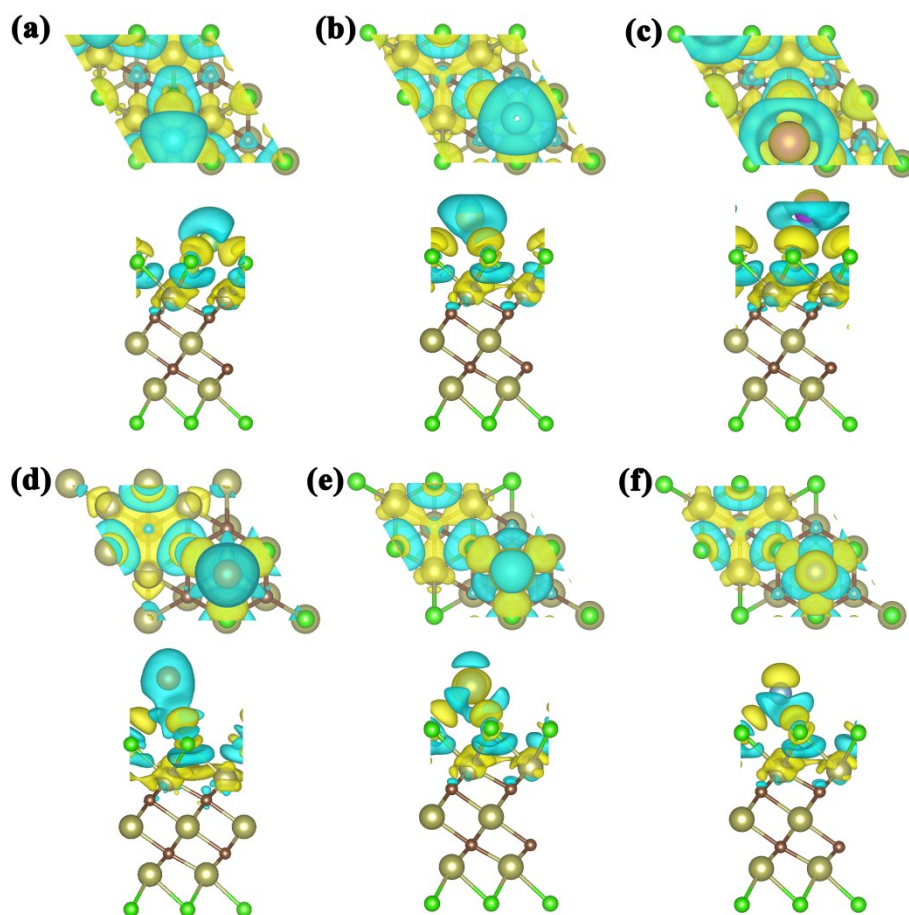

**Fig. S8.** Top and side view of charge density difference with Li, Na, K, Mg, Ca, Al adsorbed on the surface of  $\text{Hf}_3\text{C}_2\text{Cl}_2$  (a, b, c, d, e, f), respectively, with the isosurface value of  $0.0002 \text{ \AA}^{-3}$ . The yellow represents the charge sufficient, the blue represents the charge deficient.

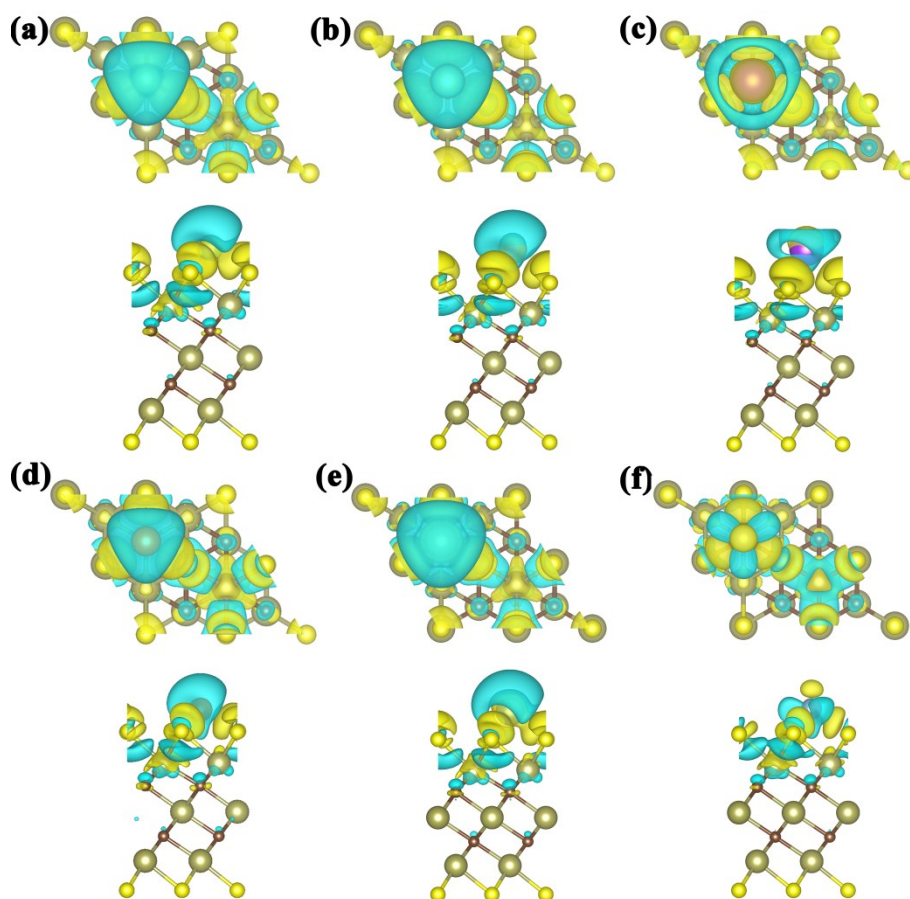

**Fig. S9.** Top and side view of charge density difference with Li, Na, K, Mg, Ca, and Al adsorbed on the surface of  $\text{Hf}_3\text{C}_2\text{S}_2$  (a, b, c, d, e, f), respectively, with the isosurface value of  $0.0002 \text{ \AA}^{-3}$ . The yellow represents the charge sufficient, the blue represents the charge deficient.

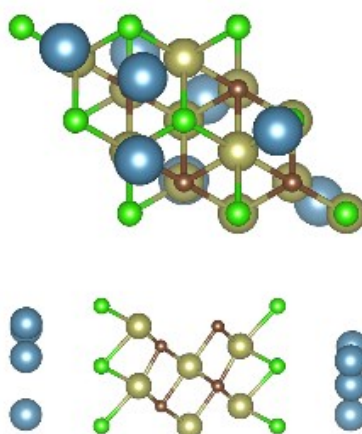

**Fig. S10.** The top and side views of  $\text{Hf}_3\text{C}_2\text{S}_2\text{Ca}_2$  monolayer.



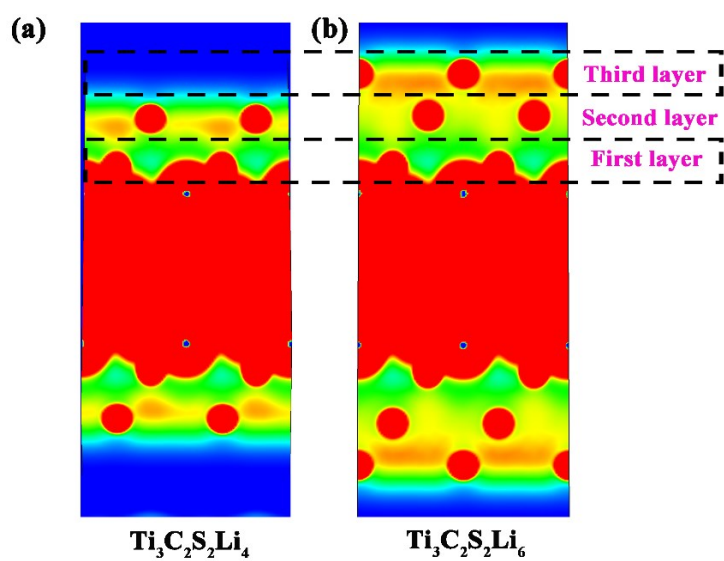

**Fig. S11.** The charge density map of  $\text{Ti}_3\text{C}_2\text{S}_2$  monolayer (011) with (a) two-layer and (b) three-layer Li atoms.

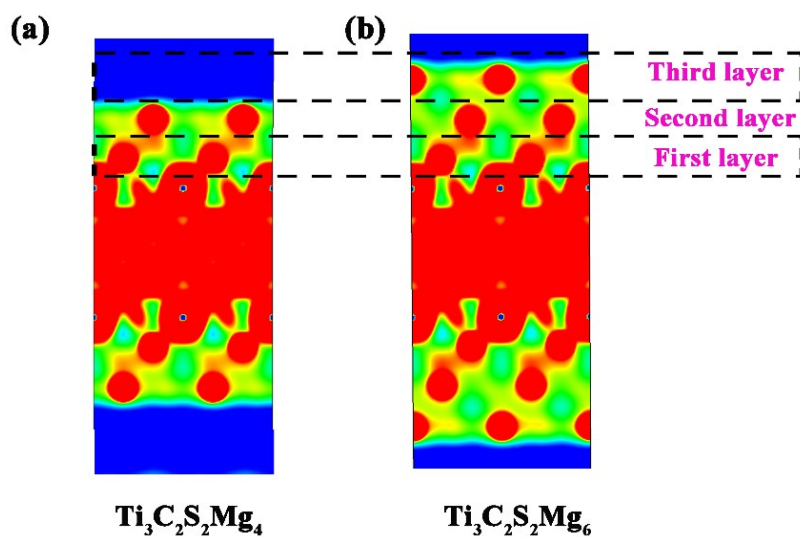

**Fig. S12.** The charge density map of  $\text{Ti}_3\text{C}_2\text{S}_2$  monolayer (011) with (a) two-layer and (b) three-layer Mg atoms.

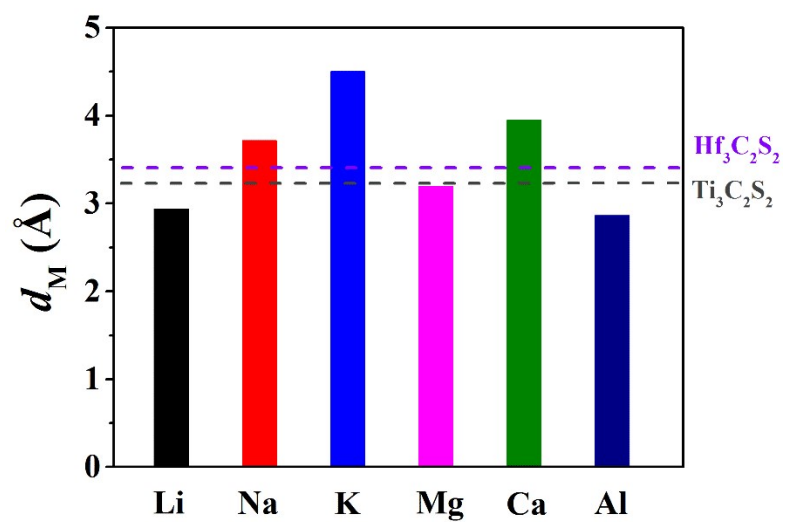

**Fig. S13.** Comparison of the metal diameters ( $d_M$ ) with the lattice constants of  $\text{Ti}_3\text{C}_2\text{S}_2$  and  $\text{Hf}_3\text{C}_2\text{S}_2$  monolayer.

## Supporting Tables

**Table S1** The structure parameter of the optimized  $\text{Ti}_3\text{C}_2\text{X}_2$  and  $\text{Hf}_3\text{C}_2\text{X}_2$  monolayer.

|                                       | Parameter(a)(Å) | Thickness d (Å) | Bond lengths (Å) |            |            |
|---------------------------------------|-----------------|-----------------|------------------|------------|------------|
|                                       |                 |                 | Ti/Hf(1)-C       | Ti/Hf(2)-C | Ti/Hf(1)-T |
| $\text{Ti}_3\text{C}_2$               | 3.100           | 4.693           | 2.100            | 2.245      |            |
| I- $\text{Ti}_3\text{C}_2\text{Si}_2$ | 3.113           | 8.832           | 2.139            | 2.219      | 2.655      |
| I- $\text{Ti}_3\text{C}_2\text{P}_2$  | 3.096           | 8.800           | 2.138            | 2.214      | 2.623      |
| I- $\text{Ti}_3\text{C}_2\text{S}_2$  | 3.223           | 8.055           | 2.229            | 2.246      | 2.417      |
| I- $\text{Ti}_3\text{C}_2\text{Cl}_2$ | 3.234           | 8.136           | 2.135            | 2.273      | 2.549      |
| $\text{Hf}_3\text{C}_2$               | 3.284           | 5.078           | 2.211            | 2.358      |            |
| I- $\text{Hf}_3\text{C}_2\text{Si}_2$ | 3.276           | 9.265           | 2.255            | 2.339      | 2.774      |
| I- $\text{Hf}_3\text{C}_2\text{P}_2$  | 3.369           | 8.671           | 2.282            | 2.373      | 2.639      |
| I- $\text{Hf}_3\text{C}_2\text{S}_2$  | 3.390           | 8.418           | 2.357            | 2.367      | 2.505      |
| I- $\text{Hf}_3\text{C}_2\text{Cl}_2$ | 3.377           | 8.855           | 2.228            | 2.389      | 2.658      |

**Table S2** The surface energy ( $\gamma$ ) and exfoliation energy ( $E_{\text{exf}}$ ) of  $\text{Ti}_3\text{C}_2\text{X}_2$  and  $\text{Hf}_3\text{C}_2\text{X}_2$  (X = Si, P, S, and Cl).

|                                      | $\text{Ti}_3\text{C}_2$ | $\text{Ti}_3\text{C}_2\text{Si}_2$ | $\text{Ti}_3\text{C}_2\text{P}_2$ | $\text{Ti}_3\text{C}_2\text{S}_2$ | $\text{Ti}_3\text{C}_2\text{Cl}_2$ |
|--------------------------------------|-------------------------|------------------------------------|-----------------------------------|-----------------------------------|------------------------------------|
| $\gamma$ (J/m <sup>2</sup> )         | 1.367                   | 1.674                              | 0.498                             | -0.796                            | -1.713                             |
| $E_{\text{exf}}$ (J/m <sup>2</sup> ) | 3.761                   | 4.717                              | 1.007                             | 0.169                             | 0.140                              |
|                                      | $\text{Hf}_3\text{C}_2$ | $\text{Hf}_3\text{C}_2\text{Si}_2$ | $\text{Hf}_3\text{C}_2\text{P}_2$ | $\text{Hf}_3\text{C}_2\text{S}_2$ | $\text{Hf}_3\text{C}_2\text{Cl}_2$ |
| $\gamma$ (J/m <sup>2</sup> )         | -0.491                  | -0.010                             | -1.524                            | -2.926                            | -3.669                             |
| $E_{\text{exf}}$ (J/m <sup>2</sup> ) | 1.992                   | 2.050                              | 1.241                             | 0.202                             | 0.087                              |

**Table S3.** The binding energy ( $E_b$ ) at different adsorption sites of metal atom on the  $\text{Ti}_3\text{C}_2\text{S}_2$ ,  $\text{Ti}_3\text{C}_2\text{Cl}_2$ ,  $\text{Hf}_3\text{C}_2\text{S}_2$ , and  $\text{Hf}_3\text{C}_2\text{Cl}_2$  monolayer.

|                                    |         | Li     | Na     | K      | Mg     | Ca     | Al     |
|------------------------------------|---------|--------|--------|--------|--------|--------|--------|
| $\text{Ti}_3\text{C}_2\text{S}_2$  | C site  | -3.524 | -2.716 | -2.734 | -2.194 | -4.116 | -3.364 |
|                                    | Ti site | -3.562 | -2.715 | -2.717 | -2.211 | -3.990 | -3.395 |
| $\text{Ti}_3\text{C}_2\text{Cl}_2$ | C site  | -2.013 | -1.098 | -1.201 | -0.219 | -1.290 | -1.316 |
|                                    | Ti site | -2.024 | -1.101 | -1.209 | -0.216 | -1.329 | -1.371 |
| $\text{Hf}_3\text{C}_2\text{S}_2$  | C site  | -3.968 | -3.251 | -3.326 | -3.089 | -5.039 | -3.992 |
|                                    | Ti site | -3.926 | -3.191 | -3.282 | -2.979 | -4.838 | -3.877 |

|                                                |         |        |        |        |        |        |        |
|------------------------------------------------|---------|--------|--------|--------|--------|--------|--------|
| Hf <sub>3</sub> C <sub>2</sub> Cl <sub>2</sub> | C site  | -1.407 | -0.677 | -0.917 | -0.188 | -0.630 | -0.700 |
|                                                | Ti site | -1.393 | -0.689 | -0.881 | -0.190 | -0.657 | -0.756 |

**Table S4.** The most stable adsorption site of metal atom on the monolayer.

|                                                | Li                 | Na                 | K                  | Mg                 | Ca                 | Al                 |
|------------------------------------------------|--------------------|--------------------|--------------------|--------------------|--------------------|--------------------|
| Hf <sub>3</sub> C <sub>2</sub> S <sub>2</sub>  | C                  | C                  | C                  | C                  | C                  | C                  |
| Hf <sub>3</sub> C <sub>2</sub> Cl <sub>2</sub> | C                  | T <sub>M</sub> (1) | C                  | T <sub>M</sub> (1) | T <sub>M</sub> (1) | T <sub>M</sub> (1) |
| Ti <sub>3</sub> C <sub>2</sub> S <sub>2</sub>  | T <sub>M</sub> (1) | C                  | C                  | T <sub>M</sub> (1) | C                  | T <sub>M</sub> (1) |
| Ti <sub>3</sub> C <sub>2</sub> Cl <sub>2</sub> | T <sub>M</sub> (1) | T <sub>M</sub> (1) | T <sub>M</sub> (1) | C                  | T <sub>M</sub> (1) | T <sub>M</sub> (1) |

**Table S5.** Charge transfer ( $|e|$ ) from metal to I-T<sub>M3</sub>C<sub>2</sub>X<sub>2</sub> monolayer by Bader charge analysis.

|                                                | Li    | Na    | K     | Mg    | Ca    | Al    |
|------------------------------------------------|-------|-------|-------|-------|-------|-------|
| Ti <sub>3</sub> C <sub>2</sub> S <sub>2</sub>  | 0.885 | 0.850 | 0.821 | 1.351 | 1.337 | 1.034 |
| Ti <sub>3</sub> C <sub>2</sub> Cl <sub>2</sub> | 0.892 | 0.694 | 0.615 | 0.098 | 0.902 | 0.845 |
| Hf <sub>3</sub> C <sub>2</sub> S <sub>2</sub>  | 0.880 | 0.867 | 0.842 | 1.572 | 1.401 | 1.358 |
| Hf <sub>3</sub> C <sub>2</sub> Cl <sub>2</sub> | 0.884 | 0.616 | 0.567 | 0.076 | 0.783 | 0.736 |

**Table S6.** Diffusion barrier energies (eV) of M on the I-T<sub>M3</sub>C<sub>2</sub>X<sub>2</sub> monolayers surface.

|                                                | Li    | Na    | K     | Mg    | Ca    | Al    |
|------------------------------------------------|-------|-------|-------|-------|-------|-------|
| Ti <sub>3</sub> C <sub>2</sub> S <sub>2</sub>  | 0.224 | 0.125 | 0.093 | 0.354 | 0.370 | 0.189 |
| Ti <sub>3</sub> C <sub>2</sub> Cl <sub>2</sub> | 0.250 | 0.081 | 0.042 | 0.002 | 0.144 | 0.114 |
| Hf <sub>3</sub> C <sub>2</sub> S <sub>2</sub>  | 0.237 | 0.162 | 0.132 | 0.543 | 0.527 | 0.289 |
| Hf <sub>3</sub> C <sub>2</sub> Cl <sub>2</sub> | 0.198 | 0.060 | 0.049 | 0.006 | 0.081 | 0.056 |

**Table S7** The calculated layer-by-layer adsorption energy ( $E_{\text{layer-n}}$ ) Ti<sub>3</sub>C<sub>2</sub>S<sub>2</sub> monolayer.

|    | $E_{\text{ad}}/\text{single}$ (eV) | $E_{\text{layer-1}}$ (eV) | $E_{\text{layer-2}}$ (eV) | $E_{\text{layer-3}}$ (eV) |
|----|------------------------------------|---------------------------|---------------------------|---------------------------|
| Li | -1.92                              | -0.97                     | -0.0036                   | -0.028                    |
| Na | -1.63                              | -0.60                     | -0.0085                   |                           |

|    |       |       |        |        |
|----|-------|-------|--------|--------|
| K  | -1.97 | -0.12 | -0.37  |        |
| Mg | -0.76 | -0.27 | -0.095 | -0.015 |
| Ca | -2.09 | -0.32 | 0.55   |        |
| Al | -0.07 | 0.35  |        |        |

**Table S8** The calculated layer-by-layer adsorption energy ( $E_{\text{layer-n}}$ ) on the  $\text{Ti}_3\text{C}_2\text{Cl}_2$  monolayer.

|    | $E_{\text{layer-1}}$ (eV) |
|----|---------------------------|
| Li | 0.21                      |
| Na | 0.12                      |
| K  | 0.75                      |
| Mg | 0.47                      |
| Ca | 0.75                      |
| Al | 1.13                      |

**Table S9** The calculated layer-by-layer adsorption energy ( $E_{\text{layer-n}}$ )  $\text{Hf}_3\text{C}_2\text{S}_2$  monolayer.

|    | $E_{\text{ad/single}}$ (eV) | $E_{\text{layer-1}}$ (eV) | $E_{\text{layer-2}}$ (eV) | $E_{\text{layer-3}}$ (eV) |
|----|-----------------------------|---------------------------|---------------------------|---------------------------|
| Li | -2.26                       |                           |                           |                           |
| Na | -2.07                       | -0.87                     | -0.054                    |                           |
| K  | -2.46                       | -0.68                     |                           |                           |
| Mg | -1.25                       | -0.36                     | -0.08                     |                           |
| Ca | -2.78                       | -0.93                     | -0.13                     | 0.21                      |
| Al | -0.42                       | 0.35                      |                           |                           |

**Table S10** The calculated layer-by-layer adsorption energy ( $E_{\text{layer-n}}$ )  $\text{Hf}_3\text{C}_2\text{Cl}_2$  monolayer.

|    | $E_{\text{layer-1}}$ (eV) |
|----|---------------------------|
| Li | 0.42                      |
| Na | 0.15                      |
| K  | 0.58                      |
| Mg | 0.58                      |
| Ca | -1.72                     |
| Al | 1.11                      |

**Table S11.** Comparisons of different layered MXene materials, with their respective storage capacities and energy barriers as Li-ion batteries

|                                   | Energy barrier/eV | Storage capacity/mA h g <sup>-1</sup> | Ref.      |
|-----------------------------------|-------------------|---------------------------------------|-----------|
| $\text{Ti}_3\text{C}_2\text{S}_2$ | 0.22              | 462.68                                | This work |
| $\text{Hf}_3\text{C}_2\text{S}_2$ | 0.24              | 85.97                                 |           |
| $\text{Ti}_2\text{CP}_2$          | 0.32              | 1264                                  | [3]       |
| $\text{V}_2\text{CP}_2$           | 0.26              | 1220                                  | [3]       |



|                                                  |       |        |     |
|--------------------------------------------------|-------|--------|-----|
| Ti <sub>2</sub> CSi <sub>2</sub>                 | 0.29  | 1767   | [3] |
| V <sub>2</sub> CSi <sub>2</sub>                  | 0.23  | 1592   | [3] |
| Ti <sub>2</sub> CS <sub>2</sub>                  | 0.22  | 311.86 | [4] |
| V <sub>2</sub> NS <sub>2</sub>                   | 0.17  | 299.52 | [5] |
| Ti <sub>2</sub> NS <sub>2</sub>                  | 0.19  | 308.28 | [5] |
| Zr <sub>2</sub> CO <sub>2</sub>                  | 0.49  | 266    | [6] |
| Zr <sub>2</sub> CS <sub>2</sub>                  | 0.22  | 259    | [6] |
| Ti <sub>3</sub> C <sub>2</sub> F <sub>2</sub>    | 0.36  | 130    | [7] |
| Ti <sub>3</sub> C <sub>2</sub> (OH) <sub>2</sub> | 0.90  | 67     | [7] |
| Hf <sub>3</sub> C <sub>2</sub> F <sub>2</sub>    | 0.225 | 80.74  | [8] |
| Hf <sub>3</sub> C <sub>2</sub> (OH) <sub>2</sub> | 0.440 | 162.57 | [8] |

**Table S12.** Comparisons of different layered MXene materials, with their respective storage capacities and energy barriers as Na-ion batteries

|                                               | Energy barrier/eV | Storage capacity/mA h g <sup>-1</sup> | Ref. |
|-----------------------------------------------|-------------------|---------------------------------------|------|
| Ti <sub>2</sub> CS <sub>2</sub>               | 0.11              | 935                                   | [4]  |
| Ti <sub>3</sub> C <sub>2</sub> O <sub>2</sub> | 0.22              | 463                                   | [9]  |
| Zr <sub>2</sub> CO <sub>2</sub>               | 0.29              | 474                                   | [10] |
| Zr <sub>3</sub> C <sub>2</sub> O <sub>2</sub> | 0.32              | 326                                   | [10] |

**Table S13.** Comparisons of energy barriers, storage capacities, and OCV of layered MXenes as Mg-ion batteries.

|                                               | Energy barrier/eV | Storage capacity/mA h g <sup>-1</sup> | OCV/V | Ref.      |
|-----------------------------------------------|-------------------|---------------------------------------|-------|-----------|
| Ti <sub>3</sub> C <sub>2</sub> S <sub>2</sub> | 0.354             | 1388                                  | 0.13  | This work |
| Ti <sub>2</sub> CS <sub>2</sub>               | 0.46              | 1871                                  | 0.10  | [4]       |
| TiS <sub>2</sub>                              | 0.55              | 957                                   | 0-0.5 | [11]      |
| Ti <sub>2</sub> CO <sub>2</sub>               | 0.71              | 570                                   | --    | [12]      |
| C <sub>2</sub> N                              | 0.04              | 1175                                  | 0.45  | [13]      |

**Table S14** The number of adsorption layers of metal atoms in different 2D materials.

|                                               | Li | Na | K | Mg | Ca | Al |
|-----------------------------------------------|----|----|---|----|----|----|
| Ti <sub>3</sub> C <sub>2</sub> S <sub>2</sub> | 2  | 2  | 1 | 3  | 1  | 0  |
| Hf <sub>3</sub> C <sub>2</sub> S <sub>2</sub> | 1  | 2  | 1 | 2  | 2  | 0  |

**Table S15.** Coordinates corresponding to the most stable structure.

| Phase                                         | Lattice Parameters | Coordinates               |
|-----------------------------------------------|--------------------|---------------------------|
| Ti <sub>3</sub> C <sub>2</sub> S <sub>2</sub> | a = b = 3.219 Å    | C1 (1.609, 0.929, 19.801) |
|                                               | α = γ = 90.000 °   | C2 (0.000, 1.858, 17.275) |

|                                    |                                                                                            |                                                                                                                                                                                                                 |
|------------------------------------|--------------------------------------------------------------------------------------------|-----------------------------------------------------------------------------------------------------------------------------------------------------------------------------------------------------------------|
|                                    | $\beta = 120.000^\circ$                                                                    | Ti1 (1.609, 0.929, 16.048)<br>Ti2 (0.000, 1.858, 21.028)<br>Ti3 (0.000, -0.000, 18.538)<br>S1 (0.000, 0.0000, 22.576)<br>S2 (1.609, 2.788, 14.500)                                                              |
| $\text{Ti}_3\text{C}_2\text{Cl}_2$ | $a = b = 3.235 \text{ \AA}$<br>$\alpha = \gamma = 90.000^\circ$<br>$\beta = 120.000^\circ$ | C1 (1.618, 0.939, 17.110)<br>C2 (0.000, 1.872, 14.516)<br>Ti1 (1.618, 0.938, 13.480)<br>Ti2 (0.001, 1.873, 18.149)<br>Ti3 (0.000, 0.005, 15.813)<br>Cl1 (1.617, 2.806, 19.880)<br>Cl2 (0.000, 0.004, 11.746)    |
| $\text{Hf}_3\text{C}_2\text{S}_2$  | $a = b = 3.390 \text{ \AA}$<br>$\alpha = \gamma = 90.000^\circ$<br>$\beta = 120.000^\circ$ | C1 (1.695, 0.9786, 20.575)<br>C2 (-0.000, 1.957, 17.907)<br>Hf1 (-0.000, 0.000, 19.241)<br>Hf2 (-0.000, 1.957, 21.888)<br>Hf3 (1.695, 0.979, 16.594)<br>S1 (-0.000, 0.000, 23.453)<br>S2 (-0.000 0.000, 15.030) |
| $\text{Hf}_3\text{C}_2\text{Cl}_2$ | $a = b = 3.371 \text{ \AA}$<br>$\alpha = \gamma = 90.000^\circ$<br>$\beta = 120.000^\circ$ | C1 (1.686, 0.973, 16.399)<br>C2 (0.000, 1.946, 13.615)<br>Hf1 (0.000, 0.000, 15.007)<br>Hf2 (0.000, 1.946, 17.476)<br>Hf3 (1.686, 0.973, 12.538)<br>Cl1 (0.000, 0.000, 19.284)<br>Cl2 (0.000, 0.000, 10.730)    |

## References

1. Y. Han, K. C. Lai, A. Lii-Rosales, M. C. Tringides, J. W. Evans and P. A. Thiel, Surface energies, adhesion energies, and exfoliation energies relevant to copper-graphene and copper-graphite systems *Surf. Sci.* 2019, **685**, 48-58.
2. P. L. Gong, F. Zhang, L. F. Huang, H. Zhang, L. Li, R. C. Xiao, B. Deng, H. Pan and X. Q. Shi, Multifunctional two-dimensional semiconductors SnP<sub>3</sub>: universal mechanism of layer-dependent electronic phase transition, *J. Phys.: Condens. Matter* 2018, **30**, 475702.
3. J. Zhu and U. Schwingenschlögl, P and Si functionalized MXenes for metal-ion battery applications, *2D Mater.* 2017, **4**, 025073.
4. Y. Wang, M. Zhou, L.-C. Xu, W. Zhao, R. Li, Z. Yang, R. Liu and X. Li, Achieving superior high-capacity batteries with the lightest Ti<sub>2</sub>C MXene anode by first-principles calculations: Overarching role of S-functionate (Ti<sub>2</sub>CS<sub>2</sub>) and multivalent cations, carrier *J. Power Sources* 2020, **451**, 227791.

5. V. Shukla, N. K. Jena, S. R. Naqvi, W. Luo and R. Ahuja, Modelling high-performing batteries with Mxenes: The case of Sfunctionalized two-dimensional nitride Mxene electrode, *Nano Energy* 2019, **58**, 877-885.
6. J. Zhu, A. Choneos, J. Eppinger and U. Schwingenschlögl, S-functionalized MXenes as electrode materials for Li-ion batteries, *Appl. Mater. Today* 2016, **5**, 19-24.
7. Q. Tang, Z. Zhou and P. Shen, Are MXenes Promising Anode Materials for Li Ion Batteries? Computational Studies on Electronic Properties and Li Storage Capability of  $Ti_3C_2$  and  $Ti_3C_2X_2$  (X = F, OH) Monolayer *J. Am. Chem. Soc.* 2012, **134**, 16909-16916.
8. Z. Yang, Y. Zheng, W. Li and J. Zhang, Investigation of Two-Dimensional Hf-Based MXenes as the Anode Materials for Li/Na-Ion Batteries: A DFT Study. *J. Comput. Chem.* 2019, **40**, 1352-1359.
9. Q. Meng, J. Ma, Y. Zhang, Z. Li, C. Zhi, A. Hu and J. Fan, The S-functionalized  $Ti_3C_2$  Mxene as a High Capacity Electrode Material for Na-ion Batteries: A DFT Study, *Nanoscale* 2018, **10**, 3385-3392.
10. Q. Meng, J. Ma, Y. Zhang, Z. Li, A. Hu, J.-J. Kai and J. Fan, Theoretical investigation of zirconium carbide MXenes as prospective high capacity anode. *J. Mater. Chem. A* 2018, **6**, 13652-13660.
11. A. Samad, A. Shafique, Y. H. Shin, Adsorption and diffusion of mono, di, and trivalent ions on two-dimensional  $TiS_2$ . *Nanotechnology* 2017, **28**, 175401.
12. Y. Xie, Y. Dall'Agnesse, M. Naguib, Y. Gogotsi, M. W. Barsoum, H. L. Zhuang, P. R. C. Kent, Prediction and Characterization of MXene Nanosheet Anodes for Non-Lithium-Ion Batteries. *ACS Nano* 2014, **8**, 9606-9615.
13. D. Wu, B. Yang, H. Chen, E. Ruckenstein, Mechanical deformation induced charge redistribution to promote the high performance of stretchable magnesium-ion batteries based on two-dimensional  $C_2N$  anodes. *Nanoscale* 2019, **11**, 15472-15478.
